# Supplementary material
Source: MDPI journal article supplement (https://www.mdpi.com/2073-4441/16/1/26)
Supplement: s1 [file s1]

Table S1 Annual rainfall, discharge and sediment load from 1960-2020

| Year | Rainfall (mm) | Discharge ( $\times 10^8$ m <sup>3</sup> ) | Sediment load ( $\times 10^8$ t) |
|------|---------------|--------------------------------------------|----------------------------------|
| 1960 | 313.4         | 12.57                                      | 0.886                            |
| 1961 | 622.3         | 16.97                                      | 1.93                             |
| 1962 | 457           | 12.59                                      | 0.683                            |
| 1963 | 582.9         | 13.79                                      | 1.85                             |
| 1964 | 663.5         | 20.15                                      | 3.1                              |
| 1965 | 273.8         | 11.33                                      | 0.426                            |
| 1966 | 398.1         | 15.95                                      | 3.75                             |
| 1967 | 543.9         | 17.85                                      | 2.73                             |
| 1968 | 387.1         | 15.92                                      | 1.59                             |
| 1969 | 473.9         | 15.02                                      | 1.72                             |
| 1970 | 404.9         | 15.76                                      | 2.56                             |
| 1971 | 340.8         | 12.89                                      | 1.34                             |
| 1972 | 311.9         | 10.55                                      | 0.596                            |
| 1973 | 558.4         | 11.83                                      | 0.684                            |
| 1974 | 318.4         | 9.46                                       | 0.526                            |
| 1975 | 512.7         | 9.19                                       | 0.346                            |
| 1976 | 508.9         | 10.36                                      | 0.316                            |
| 1977 | 686.7         | 14.7                                       | 2.69                             |
| 1978 | 678.7         | 14.9                                       | 1.92                             |
| 1979 | 433.8         | 11.4                                       | 0.619                            |
| 1980 | 392.5         | 9.78                                       | 0.446                            |
| 1981 | 384.8         | 11                                         | 0.653                            |
| 1982 | 364.2         | 10.3                                       | 0.611                            |
| 1983 | 452.1         | 9.49                                       | 0.254                            |
| 1984 | 450.8         | 10.1                                       | 0.41                             |
| 1985 | 558.6         | 11.7                                       | 0.728                            |
| 1986 | 313.3         | 9.7                                        | 0.24                             |
| 1987 | 391.9         | 9.56                                       | 0.555                            |
| 1988 | 506.2         | 12.5                                       | 1.02                             |
| 1989 | 461.2         | 9.48                                       | 0.353                            |
| 1990 | 553.5         | 9.848                                      | 0.558                            |
| 1991 | 448.8         | 9.417                                      | 0.632                            |
| 1992 | 473.7         | 10.24                                      | 0.882                            |
| 1993 | 480.3         | 7.179                                      | 0.334                            |
| 1994 | 598.7         | 11.61                                      | 2.08                             |
| 1995 | 454           | 10.93                                      | 1.45                             |
| 1996 | 488.1         | 10.79                                      | 0.875                            |
| 1997 | 264.2         | 7.536                                      | 0.407                            |
| 1998 | 429.2         | 8.511                                      | 0.842                            |
| 1999 | 307.7         | 7.36                                       | 0.346                            |
| 2000 | 421.8         | 6.749                                      | 0.285                            |
| 2001 | 451.1         | 8.672                                      | 0.958                            |

|      |       |       |        |
|------|-------|-------|--------|
| 2002 | 553.3 | 9.024 | 0.697  |
| 2003 | 530.6 | 8.363 | 0.137  |
| 2004 | 311.8 | 6.964 | 0.369  |
| 2005 | 362.3 | 6.086 | 0.12   |
| 2006 | 504.6 | 6.722 | 0.563  |
| 2007 | 652.8 | 7.37  | 0.336  |
| 2008 | 440.7 | 6.203 | 0.0267 |
| 2009 | 635.3 | 9.276 | 0.119  |
| 2010 | 464.8 | 8.437 | 0.037  |
| 2011 | 558   | 7.629 | 0.058  |
| 2012 | 500.9 | 9.029 | 0.198  |
| 2013 | 680.5 | 10.39 | 0.273  |
| 2014 | 577.4 | 8.448 | 0.061  |
| 2015 | 423.9 | 7.71  | 0.061  |
| 2016 | 478.7 | 10.23 | 0.139  |
| 2017 | 697.7 | 10.74 | 0.845  |
| 2018 | 489.8 | 8.895 | 0.193  |
| 2019 | 334.1 | 7.995 | 0.179  |
| 2020 | 668.2 | 8.259 | 0.036  |

Table S2 Water use, population and GDP of Yulin city from 1991-2015

|      | Water use<br>(100 million m <sup>3</sup> ) | Population<br>(10,000) | GDP (100 million<br>yuan) |
|------|--------------------------------------------|------------------------|---------------------------|
| 1991 | 5.4                                        | 300.15                 | 17.31                     |
| 1992 | 5.52                                       | 305.30                 | 21.68                     |
| 1993 | 6.31                                       | 309.40                 | 25.58                     |
| 1994 | 5.70                                       | 305.00                 | 41.94                     |
| 1995 | 5.74                                       | 309.73                 | 45.97                     |
| 1996 | 5.75                                       | 313                    | 59.35                     |
| 1997 | 5.59                                       | 315                    | 58.27                     |
| 1998 | 5.73                                       | 316.22                 | 65.11                     |
| 1999 | 5.92                                       | 317.74                 | 70.02                     |
| 2000 | 5.77                                       | 326.04                 | 75.05                     |
| 2001 | 5.84                                       | 327.98                 | 92.63                     |
| 2002 | 5.98                                       | 329.56                 | 111.36                    |
| 2003 | 6.00                                       | 333.54                 | 138.1                     |
| 2004 | 6.02                                       | 336.79                 | 185.04                    |
| 2005 | 6.33                                       | 329.93                 | 320.04                    |
| 2006 | 6.76                                       | 30.33                  | 439.47                    |
| 2007 | 6.90                                       | 332.80                 | 674.25                    |
| 2008 | 7.09                                       | 333.98                 | 1008.26                   |
| 2009 | 6.90                                       | 334.73                 | 1302.31                   |
| 2010 | 6.92                                       | 335.42                 | 1756.07                   |
| 2011 | 7.32                                       | 335.24                 | 2292.25                   |

|      |      |        |         |
|------|------|--------|---------|
| 2012 | 7.53 | 335.69 | 2669.88 |
| 2013 | 8.08 | 337.03 | 2846.75 |
| 2014 | 7.59 | 338.39 | 2920.58 |
| 2015 | 7.72 | 340.11 | 2491.88 |

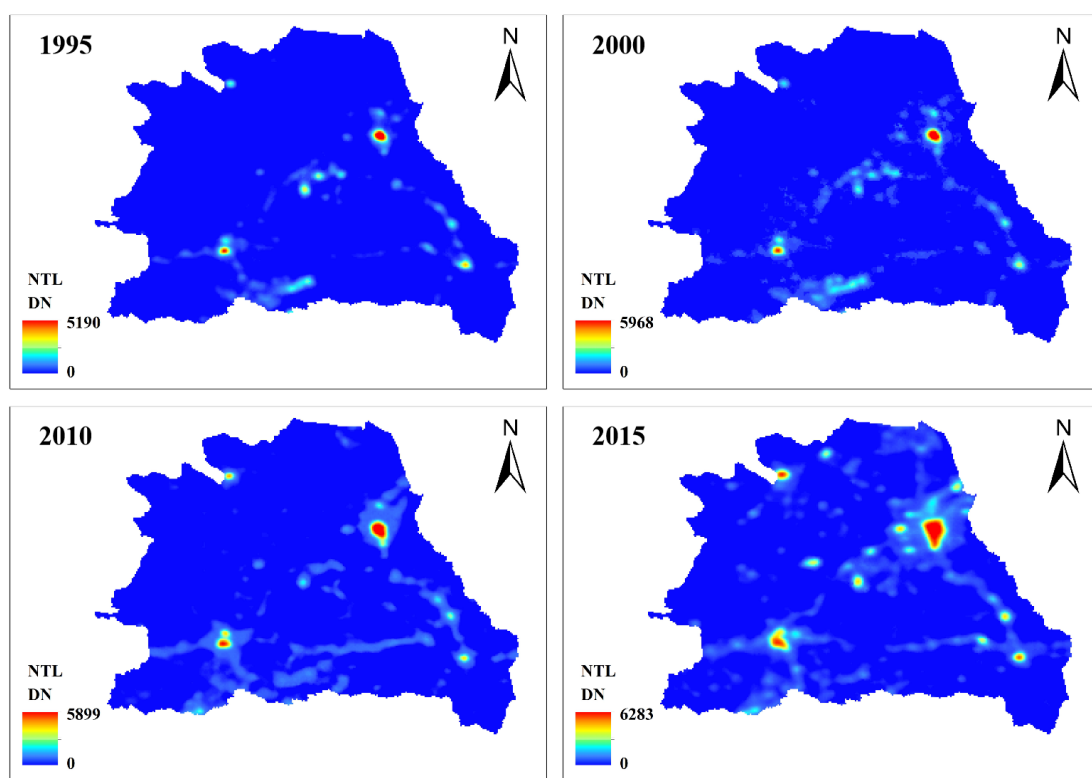

Figure S1 A Prolonged Artificial Nighttime-light Map of Wuding River Basin from 1995-2015
